# Supplementary material
Source: PubMed Central journal article supplement (PMC5865639)
Supplement: NIHMS934491-supplement-SI_Table.pdf [file NIHMS934491-supplement-SI_Table.pdf]

|              |                                                                                                        |     |     |     |       |          |          |          |           |           |           |           |           |           |           |           |            |           |           |           |           |           |          |          |
|--------------|--------------------------------------------------------------------------------------------------------|-----|-----|-----|-------|----------|----------|----------|-----------|-----------|-----------|-----------|-----------|-----------|-----------|-----------|------------|-----------|-----------|-----------|-----------|-----------|----------|----------|
| GLYM_HUMAN   | Serine hydroxymethyltransferase, mitochondrial OS=Homo sapiens GN=SHMT2 PE1 SV=3                       | 12  | 8   | 1.3 | 0.630 | 8146.2   | 8511.1   | 8640.6   | 68797.9   | 105657.3  | 101389.1  | 25344.4   | 28798.0   | 241322.4  | 213163.4  | 231192.7  | 221907.6   | 65127.5   | 65155.8   | 47923.2   | 10274.1   | 10096.0   | 8911.6   |          |
| GNXN_HUMAN   | Sulfotransferase 1 OS=Homo sapiens GN=GNXN1 PE1 SV=1                                                   | 9   | 5   | 1.2 | 0.581 | 438.6    | 714.8    | 677.5    | 7727.0    | 8267.4    | 9644.8    | 4646.8    | 4693.9    | 33119.1   | 4443.8    | 2272.2    | 2727.9     | 9637.0    | 6521.9    | 6768.3    | 1175.6    | 697.7     | 614.2    |          |
| LR3C_HUMAN   | 14-3-3 protein epsilon OS=Homo sapiens GN=YYHA6 PE1 SV=1                                               | 17  | 14  | 1.2 | 0.611 | 4854.4   | 4510.0   | 4455.6   | 51034.7   | 90088.8   | 51077.7   | 71828.6   | 15273.3   | 10982.4   | 111734.1  | 108620.3  | 188661.1   | 37266.1   | 37665.1   | 10944.9   | 12317.3   | 11155.1   |          |          |
| PR3A_HUMAN   | Proteinase subtilisin type 1 OS=Homo sapiens GN=PR3A PE1 SV=1                                          | 6   | 6   | 1.2 | 0.587 | 334.3    | 227.6    | 247.1    | 5985.5    | 8427.0    | 16188.8   | 1270.8    | 3342.4    | 4371.6    | 4393.8    | 2649.7    | 1921.3     | 3245.1    | 3245.1    | 3245.1    | 3031.0    | 3172.3    | 2677.2   |          |
| HNRP3_HUMAN  | Heterogeneous nuclear ribonucleoprotein C1 OS=Homo sapiens GN=HNRP3 PE1 SV=4                           | 9   | 6   | 1.2 | 0.839 | 293.6    | 184.5    | 203.5    | 1305.1    | 3727.6    | 7074.4    | 5026.5    | 8594.8    | 10602.5   | 3386.1    | 817.8     | 4817.6     | 7363.9    | 10381.9   | 7582.5    | 1011.6    | 636.8     | 542.7    |          |
| RRP30_HUMAN  | rRNA poly(A)-associated protein 3 OS=Homo sapiens GN=RRP30 PE1 SV=2                                    | 3   | 3   | 1.2 | 0.444 | 3028.2   | 6652.6   | 6194.3   | 50170.9   | 36587.1   | 30342.1   | 48205.1   | 46747.4   | 33017.7   | 26277.7   | 27498.8   | 32445.9    | 36248.8   | 31627.9   | 34223.1   | 10383.2   | 10543.3   | 1142.3   |          |
| NSPC1_HUMAN  | Paraneoplastic neuregulin 1 OS=Homo sapiens GN=NSPC1 PE1 SV=1                                          | 3   | 2   | 1.2 | 0.377 | 217.7    | 231.9    | 205.7    | 2564.9    | 4564.6    | 4448.1    | 33784.6   | 32685.9   | 21128.3   | 28153.1   | 22376.4   | 3284.4     | 3589.9    | 3246.2    | 415.4     | 421.6     | 436.1     |          |          |
| PUR1_HUMAN   | Arabinoside-5-phosphoryltransferase OS=Homo sapiens GN=PFAT PE1 SV=1                                   | 2   | 2   | 1.2 | 0.641 | 1159.9   | 1251.4   | 1422.9   | 6936.4    | 8659.7    | 14017.7   | 10637.5   | 22811.8   | 16735.5   | 22634.4   | 19256.8   | 19624.9    | 19256.8   | 19256.8   | 19256.8   | 2074.3    | 19256.8   | 5147.3   |          |
| MCM2_HUMAN   | DNA replication licensing factor MCM2 OS=Homo sapiens GN=MCM2 PE1 SV=4                                 | 6   | 6   | 1.2 | 0.791 | 285.9    | 117.5    | 326.7    | 31187.8   | 8388.9    | 859.9     | 22727.1   | 10020.7   | 5411.3    | 10322.2   | 21222.4   | 31702.0    | 988.9     | 2528.0    | 1627.     | 224.9     | 149.9     | 41.8     |          |
| TBPA_HUMAN   | Tubulin beta-4B chain OS=Homo sapiens GN=TBPA PE1 SV=1                                                 | 64  | 2   | 1.2 | 0.788 | 26517.0  | 24574.4  | 23012.9  | 24872.6   | 7167.0    | 72479.3   | 42093.2   | 69276.8   | 889763.6  | 479567.8  | 513208.9  | 81062.2    | 81062.2   | 21447.8   | 18399.5   | 23072.8   | 22479.0   | 22198.8  |          |
| ALFA1_HUMAN  | Alpha-amylase isoform 1 OS=Homo sapiens GN=ALFA1 PE1 SV=5                                              | 7   | 5   | 1.2 | 0.739 | 3614.2   | 3177.0   | 3651.1   | 18227.2   | 25382.7   | 11727.8   | 132728.1  | 145893.4  | 138991.4  | 83333.8   | 137287.5  | 101067.8   | 38776.6   | 42448.8   | 51746.2   | 45240.3   | 39533.5   | 4141.8   |          |
| MUTL1_HUMAN  | MutL domain-containing protein 1 OS=Homo sapiens GN=MUTL1 PE1 SV=3                                     | 16  | 16  | 1.2 | 0.841 | 4786.0   | 4728.8   | 4724.9   | 44429.8   | 44429.8   | 44429.8   | 44429.8   | 44429.8   | 44429.8   | 44429.8   | 44429.8   | 44429.8    | 44429.8   | 44429.8   | 44429.8   | 44429.8   | 44429.8   | 44429.8  |          |
| FMG1_HUMAN   | High mobility group protein 1 OS=Homo sapiens GN=HMGB1 PE1 SV=3                                        | 9   | 6   | 1.2 | 0.694 | 282.2    | 298.0    | 344.9    | 5665.5    | 6504.8    | 4385.2    | 6877.0    | 12533.0   | 3811.3    | 5818.9    | 4512.1    | 6804.2     | 538.9     | 5764.3    | 7088.0    | 719.1     | 631.7     | 526.5    |          |
| Y43N_HUMAN   | 14-3-3 protein eta OS=Homo sapiens GN=YYHAH PE1 SV=4                                                   | 6   | 2   | 1.2 | 0.771 | 85.6     | 79.5     | 59.1     | 850.9     | 1227.4    | 70.8      | 194.1     | 2170.8    | 3918.7    | 2022.5    | 3008.8    | 3033.7     | 528.1     | 670.8     | 483.8     | 411.0     | 130.4     | 70.6     |          |
| GSTP1_HUMAN  | Glutathione S-transferase P OS=Homo sapiens GN=GSTP1 PE1 SV=2                                          | 2   | 2   | 1.2 | 0.824 | 39.6     | 49.6     | 73.2     | 795.2     | 222.9     | 49.0      | 1773.5    | 11718.8   | 927.4     | 496.1     | 311.2     | 2203.3     | 687.2     | 1182.8    | 867.2     | 607.2     | 190.8     | 108.1    |          |
| RLN2_HUMAN   | 60S ribosomal protein L7 OS=Homo sapiens GN=RLN2 PE1 SV=1                                              | 12  | 9   | 1.1 | 0.870 | 4987.1   | 4970.3   | 4583.1   | 38470.9   | 35737.2   | 27632.7   | 61490.5   | 73419.5   | 77478.5   | 45960.8   | 52728.2   | 54175.5    | 37917.0   | 34588.0   | 34881.1   | 11447.6   | 12601.0   | 12297.8  |          |
| PCNA_HUMAN   | Cyclin associated protein PCNA OS=Homo sapiens GN=PCNA PE1 SV=1                                        | 4   | 2   | 1.1 | 0.816 | 684.6    | 689.7    | 693.2    | 5256.7    | 5256.7    | 5256.7    | 5256.7    | 5256.7    | 5256.7    | 5256.7    | 5256.7    | 5256.7     | 5256.7    | 5256.7    | 5256.7    | 5256.7    | 5256.7    | 5256.7   |          |
| ZARA_HUMAN   | 3-thydroxy-isovaleryl-coenzyme A synthase 2 OS=Homo sapiens GN=PPP2R2A PE1 SV=2                        | 4   | 2   | 1.1 | 0.715 | 656.3    | 753.3    | 690.4    | 5345.5    | 4068.3    | 5368.3    | 5885.5    | 11611.1   | 16344.5   | 16315.5   | 14150.0   | 3308.8     | 3494.8    | 974.3     | 859.1     | 974.3     | 859.1     | 1145.4   |          |
| MARCKS_HUMAN | Myristoylated alanine-rich C-kinase substrate OS=Homo sapiens GN=MARCKS PE1 SV=4                       | 3   | 2   | 1.1 | 0.868 | 145.6    | 120.8    | 112.3    | 1726.1    | 7324.1    | 4508.1    | 13735.1   | 17733.4   | 16556.8   | 18151.6   | 25069.8   | 20720.9    | 131.8     | 0.0       | 0.0       | 152.9     | 270.2     | 138.4    |          |
| SEPH1_HUMAN  | Seleno P1 OS=Homo sapiens GN=SEPH1 PE1 SV=2                                                            | 15  | 12  | 1.1 | 0.866 | 62697.7  | 48124.7  | 41173.2  | 101763.0  | 101763.0  | 94362.3   | 87663.1   | 100718.2  | 136770.8  | 142431.7  | 150604.2  | 620099.2   | 847096.0  | 72087.8   | 7107.9    | 62833.3   | 63989.7   |          |          |
| PCP01_HUMAN  | DNA polymerase delta catalytic subunit OS=Homo sapiens GN=POLD1 PE1 SV=2                               | 1   | 1   | 1.1 | 0.860 | 151.0    | 170.8    | 201.6    | 13445.8   | 5810.0    | 5810.0    | 5810.0    | 5810.0    | 5810.0    | 5810.0    | 5810.0    | 5810.0     | 5810.0    | 5810.0    | 5810.0    | 5810.0    | 5810.0    | 5810.0   |          |
| SPIN1_HUMAN  | 14-3-3 protein zeta OS=Homo sapiens GN=YYHA1 PE1 SV=1                                                  | 11  | 10  | 1.0 | 0.933 | 4440.7   | 5214.3   | 6350.1   | 52711.6   | 22247.3   | 28731.3   | 22576.5   | 22268.2   | 18139.8   | 14860.7   | 18488.4   | 17229.2    | 14233.6   | 14233.6   | 6077.4    | 10416.6   | 9134.6    | 7175.5   |          |
| STAM1_HUMAN  | Ran-specific GTPase-activating protein 1 OS=Homo sapiens GN=STAM1 PE1 SV=1                             | 2   | 2   | 1.0 | 0.860 | 3015.4   | 2219.6   | 1970.1   | 24414.6   | 18055.2   | 3898.2    | 46258.6   | 52918.9   | 46258.6   | 3898.2    | 3898.2    | 3898.2     | 3898.2    | 3898.2    | 3898.2    | 3898.2    | 3898.2    | 3898.2   |          |
| OTUB1_HUMAN  | Ubiquitin thioesterase OTUB1 OS=Homo sapiens GN=OTUB1 PE1 SV=2                                         | 7   | 6   | 1.0 | 0.833 | 695.1    | 682.3    | 668.4    | 14320.8   | 14320.8   | 12217.3   | 14320.8   | 14320.8   | 14320.8   | 14320.8   | 14320.8   | 14320.8    | 14320.8   | 14320.8   | 14320.8   | 14320.8   | 14320.8   | 14320.8  |          |
| PCU1_HUMAN   | Proteinase subtilisin type 1 OS=Homo sapiens GN=PCU1 PE1 SV=1                                          | 13  | 10  | 1.0 | 0.827 | 29265.7  | 12907.0  | 13178.7  | 10889.1   | 20630.4   | 28383.0   | 28624.5   | 29245.5   | 29344.5   | 18320.6   | 24312.1   | 18124.3    | 38268.6   | 13521.8   | 22544.9   | 20065.3   | 12657.0   | 19802.0  |          |
| TBA1C_HUMAN  | Tubulin alpha-1C chain OS=Homo sapiens GN=TUBA1C PE1 SV=1                                              | 58  | 17  | 1.0 | 0.985 | 10.9     | 10.0     | 7.0      | 0.0       | 0.0       | 80.4      | 0.0       | 817.4     | 837.1     | 0.0       | 0.0       | 89.2       | 0.0       | 34.8      | 0.0       | 0.0       | 18.7      |          |          |
| PFYB1_HUMAN  | Arabinoside-5-phosphoryltransferase factor 1 OS=Homo sapiens GN=PFYB1 PE1 SV=1                         | 4   | 4   | 1.0 | 0.997 | 122.6    | 410.9    | 388.4    | 2708.5    | 2828.3    | 17086.3   | 10260.0   | 10710.7   | 16137.2   | 14111.8   | 10138.8   | 14432.1    | 4285.5    | 2228.1    | 3696.2    | 3696.2    | 3696.2    | 3696.2   |          |
| HSP1A_HUMAN  | Heat shock 70kDa protein OS=Homo sapiens GN=HSP1A PE1 SV=2                                             | 5   | 5   | 1.0 | 0.991 | 456.0    | 398.8    | 429.0    | 6886.0    | 6925.6    | 14895.3   | 18652.1   | 19497.0   | 19497.0   | 19497.0   | 19497.0   | 19497.0    | 19497.0   | 19497.0   | 19497.0   | 19497.0   | 19497.0   | 19497.0  |          |
| GTPCR_HUMAN  | Transmembrane receptor GTPCR OS=Homo sapiens GN=GPCR1 PE1 SV=2                                         | 27  | 28  | 1.0 | 0.963 | 846.3    | 965.5    | 868.4    | 12007.3   | 121098.2  | 113885.5  | 128011.8  | 134246.6  | 144840.6  | 78484.2   | 78838.5   | 78339.2    | 142826.1  | 188957.2  | 186221.8  | 18576.4   | 16444.4   | 15744.5  |          |
| GNAS3_HUMAN  | Histone deacetylase 3 OS=Homo sapiens GN=HDAC3 PE1 SV=2                                                | 207 | 180 | 1.0 | 0.910 | 529104.7 | 540000.0 | 519440.7 | 1194407.3 | 1230842.8 | 1182009.2 | 1402263.6 | 1648491.8 | 1697820.1 | 1709602.6 | 1713304.0 | 10144881.0 | 1420408.2 | 1420408.2 | 1420408.2 | 1171404.2 | 1171404.2 | 619288.6 | 633478.6 |
| DNX1A_HUMAN  | ATP-dependent RNA helicase DDX18A OS=Homo sapiens GN=DDX18A PE1 SV=2                                   | 9   | 1   | 1.0 | 0.848 | 677.6    | 541.8    | 712.1    | 0.0       | 0.0       | 0.0       | 0.0       | 0.0       | 0.0       | 0.0       | 0.0       | 0.0        | 0.0       | 0.0       | 686.9     | 618.0     | 712.8     |          |          |
| ATPA_HUMAN   | ATP synthase subunit alpha, mitochondrial OS=Homo sapiens GN=ATPA PE1 SV=1                             | 27  | 22  | 0.9 | 0.795 | 24817.7  | 24267.0  | 20988.3  | 180272.2  | 170889.7  | 221222.6  | 180809.2  | 174245.6  | 106889.0  | 86242.7   | 94622.2   | 911179.5   | 414915.3  | 326262.6  | 444494.4  | 39011.1   | 40148.8   | 4004.2   |          |
| ENOS1_HUMAN  | Endothelial nitric oxide synthase OS=Homo sapiens GN=ENOS1 PE1 SV=2                                    | 13  | 3   | 0.9 | 0.916 | 295.9    | 325.5    | 324.9    | 2295.6    | 4095.9    | 6935.6    | 10334.4   | 6272.3    | 9594.0    | 2881.1    | 5235.5    | 9165.7     | 3294.3    | 10511.3   | 12744.6   | 1064.5    | 961.4     | 934.4    |          |
| RSN1_HUMAN   | 60S ribosomal protein R3a OS=Homo sapiens GN=RSN1 PE1 SV=1                                             | 21  | 20  | 0.9 | 0.783 | 13359.8  | 12715.5  | 12710.9  | 104640.7  | 145043.5  | 156832.0  | 128977.3  | 187862.3  | 198968.7  | 86231.5   | 83187.6   | 82789.9    | 138116.9  | 22930.0   | 28511.5   | 17612.7   | 16742.2   |          |          |
| ADCY8_HUMAN  | Adenylate cyclase 8 OS=Homo sapiens GN=ADCY8 PE1 SV=2                                                  | 3   | 1   | 0.9 | 0.909 | 61.0     | 96.5     | 68.8     | 0.0       | 0.0       | 0.0       | 0.0       | 148.7     | 1249.5    | 0.0       | 0.0       | 0.0        | 0.0       | 629.9     | 549.1     | 48.1      | 67.3      |          |          |
| MDH2_HUMAN   | Malate dehydrogenase, cytosolic OS=Homo sapiens GN=MDH1 PE1 SV=1                                       | 10  | 8   | 0.9 | 0.788 | 4444.4   | 4050.0   | 4494.9   | 8554.6    | 7673.8    | 7124.8    | 18792.6   | 23844.0   | 13188.4   | 12054.0   | 10689.9   | 31188.8    | 47511.8   | 51504.4   | 45778.7   | 4752.7    | 4752.7    |          |          |
| HRP23_HUMAN  | Dolichyl-diphosphopantoic acid-protein glycosyltransferase subunit 2 OS=Homo sapiens GN=HRP23 PE1 SV=3 | 4   | 3   | 0.9 | 0.820 | 924.8    | 1033.1   | 1032.0   | 63054.8   | 36470.7   | 42300.5   | 17500.1   | 91024.3   | 123988.0  | 40947.2   | 79420.0   | 72137.4    | 26922.3   | 161384.3  | 74934.4   | 6945.5    | 7581.6    | 7391.5   |          |
| HEFH1_HUMAN  | EF hand domain-containing protein 1 OS=Homo sapiens GN=HEFH1 PE1 SV=1                                  | 4   | 4   | 0.9 | 0.849 | 332.7    | 297.4    | 292.3    | 0.0       | 0.0       | 0.0       | 296.1     | 0.0       | 0.0       | 117.4     | 0.0       | 0.0        | 187.4     | 83.4      | 391.2     | 309.9     | 256.1     |          |          |
| HNRPD_HUMAN  | Heterogeneous nuclear ribonucleoprotein D OS=Homo sapiens GN=HNRPD PE1 SV=1                            | 4   | 3   | 0.9 | 0.783 | 737.1    | 849.4    | 1333.0   | 22.8      | 18.2      | 39.8      | 1538.3    | 181.4     | 118.4     | 319.7     | 72.5      | 320.9      | 481.8     | 1699.9    | 423.8     | 883.2     | 577.0     | 730.1    |          |
| RLN1A_HUMAN  | 60S ribosomal protein L1a OS=Homo sapiens GN=RLN1A PE1 SV=2                                            | 3   | 3   | 0.9 | 0.858 | 16.3     | 5.9      | 5.3      | 0.0       | 0.0       | 84.6      | 69.7      | 0.0       | 148.7     | 298.0     | 132.2     | 238.9      | 101.6     | 157.5     | 3.2       | 3.3       | 3.8       |          |          |
| EIF3S_HUMAN  | Eukaryotic translation initiation factor 3 subunit G OS=Homo sapiens GN=EIF3G PE1 SV=4                 | 2   | 2   | 0.9 | 0.739 | 533.9    | 966.0    | 493.7    | 8503.5    | 5243.6    | 5243.6    | 14154.0   | 11818.4   | 14645.4   | 11818.4   | 14645.4   | 14666.7    | 14666.7   | 14666.7   | 14666.7   | 813.1     | 1217.2    | 128.1    |          |
| MARF1_HUMAN  | Microtubule-associated protein RABIP family member 1 OS=Homo sapiens GN=MAPR1 PE1 SV=1                 |     |     |     |       |          |          |          |           |           |           |           |           |           |           |           |            |           |           |           |           |           |          |          |
